# Supplementary material
Source: publisher site journal article supplement (https://en-cdn.bio-protocol.org/attached/file/20170917/Appendix.docx)
Supplement: Supplementary file 1 [file Appendix.docx]

**Appendix**

**Full sequence of the construct utilized in this work**

ATGGTTGATTACTCTGTTTGGGATCATATCGAAGTTTCCGATGATGAAGATGAAACCCACCCAAATATTGATACCGCTTCTTTGTTTAGATGGAGACATCAAGCTAGAGTTGAAAGAATGGAACAATTCCAAAAAGAAAAAGAAGAATTGGACAGAGGTTGCAGAGAATGCAAAAGAAAAGTTGCTGAATGTCAAAGAAAATTGAAAGAATTAGAAGTCGCCGAAGGTGGTAAAGCTGAATTGGAAAGATTGCAAGCTGAAGCCCAACAATTGAGAAAAGAAGAAAGATCCTGGGAACAAAAGTTGGAAGAAATGAGAAAGAAAGAAAAATCCATGCCATGGAACGTTGACACCTTGTCTAAAGATGGTTTCTCCAAGTCTATGGTTAACACCAAACCAGAAAAGACCGAAGAAGATTCCGAAGAAGTCAGAGAACAAAAGCACAAGACTTTCGTCGAAAAGTACGAAAAGCAAATCAAGCACTTCGGTATGTTGAGAAGATGGGATGATTCTCAAAAGTACTTGTCCGATAACGTTCACTTGGTTTGTGAAGAAACTGCCAACTACTTGGTTATTTGGTGCATCGATTTGGAAGTCGAAGAAAAATGTGCCTTGATGGAACAAGTTGCTCATCAAACTATCGTCATGCAATTCATCTTGGAATTGGCCAAGTCTTTGAAGGTTGATCCAAGAGCTTGTTTCAGACAATTCTTCACCAAGATTAAGACCGCCGACAGACAATATATGGAAGGTTTTAATGACGAATTGGAAGCTTTCAAAGAAAGAGTTAGAGGTAGAGCCAAGTTGAGAATTGAAAAGGCTATGAAGGAATACGAAGAAGAAGAAAGAAAAAAAAGATTGGGTCCAGGTGGTTTGGATCCAGTTGAAGTTTATGAATCTTTGCCTGAAGAATTACAAAAGTGCTTCGATGTTAAGGACGTTCAAATGTTGCAAGATGCCATCTCTAAAATGGATCCAACTGATGCTAAGTACCACATGCAAAGATGTATTGATTCAGGTTTGTGGGTCCCAAATTCTAAAGCTTCTGAAGCTAAAGAAGGTGAAGAAGCTGGTCCTGGTGATCCTTTGTTGGAAGCTGTTCCAAAAACTGGTGACGAAAAGGATGTTTCCGTTCAAAACTTGTACTTCCAAGGTGGTTCTGGTGCTACTAATTTCAGTTTGTTGAAGCAAGCCGGTGACGTTGAAGAAAATCCAGGTCCAATGCCTGAAGAAGTTCATCACGGTGAAGAAGAAGTTGAAACTTTTGCTTTCCAAGCCGAAATTGCCCAATTGATGTCCTTGATTATTAACACCTTCTACTCTAACAAAGAAATCTTCTTGAGAGAATTGATCTCCAACGCTTCTGATGCCTTGGATAAGATTAGATACGAATCTTTGACCGACCCATCCAAATTGGATTCTGGTAAAGAATTGAAGATCGACATCATCCCAAACCCACAAGAAAGAACTTTGACTTTGGTTGATACTGGTATCGGTATGACTAAGGCCGATTTGATTAACAACTTGGGTACTATTGCTAAGTCCGGTACTAAGGCTTTTATGGAAGCCTTACAAGCTGGTGCTGATATTTCTATGATTGGTCAATTTGGTGTCGGTTTCTACTCTGCTTACTTGGTTGCTGAAAAGGTTGTTGTTATTACCAAGCACAACGACGATGAACAATATGCTTGGGAATCTTCAGCTGGTGGTTCTTTTACTGTTAGAGCTGATCATGGTGAACCTATTGGTAGAGGTACAAAGGTTATCTTGCACTTGAAAGAAGATCAAACCGAATACTTGGAAGAAAGAAGAGTCAAAGAAGTCGTCAAGAAGCACTCTCAATTCATTGGTTATCCAATCACCTTGTATTTGGAAAAAGAAAGAGAAAAAGAAATCTCCGACGACGAAGCTGAAGAAGAAAAAGGTGAAAAAGAAGAAGAAGATAAGGACGACGAAGAAAAGCCAAAGATTGAAGATGTTGGTTCCGACGAAGAAGATGATTCAGGTAAAGACAAGAAAAAGAAAACTAAGAAAATCAAAGAAAAGTACATCGATCAAGAAGAATTGAACAAGACCAAGCCAATCTGGACTAGAAACCCAGATGATATTACCCAAGAAGAATACGGTGAATTCTACAAGTCCTTGACTAACGATTGGGAAGATCATTTGGCTGTCAAGCACTTTTCTGTAGAAGGTCAATTGGAATTCAGAGCCTTGTTGTTCATTCCAAGAAGAGCACCATTTGACTTGTTCGAAAACAAAAAGAAGAAGAACAACATCAAGTTGTACGTTAGAAGAGTTTTCATCATGGACTCTTGCGACGAATTGATTCCAGAATACTTGAACTTCATCAGAGGTGTTGTTGATTCTGAAGATTTGCCATTGAACATTTCCAGAGAAATGTTACAACAATCCAAGATTTTGAAGGTCATCAGAAAGAACATCGTCAAGAAGTGCTTGGAATTATTCTCCGAATTGGCCGAAGATAAGGAAAACTACAAGAAGTTCTACGAAGCCTTCTCCAAGAACTTGAAGTTGGGTATTCATGAAGATTCCACCAACAGAAGAAGATTGTCCGAATTATTGAGATACCACACCTCTCAATCTGGTGACGAAATGACTTCTTTGTCTGAATACGTCAGTAGAATGAAGGAAACCCAAAAGTCCATCTACTACATTACCGGTGAATCCAAAGAACAAGTTGCTAACTCTGCTTTCGTTGAAAGAGTTAGAAAGAGAGGTTTCGAAGTTGTCTACATGACCGAACCTATTGATGAATACTGCGTTCAACAATTGAAAGAATTCGATGGTAAATCCTTGGTTTCCGTCACAAAAGAAGGTTTGGAATTGCCAGAAGATGAAGAAGAAAAGAAAAAGATGGAAGAATCCAAGGCCAAGTTTGAAAACTTGTGCAAGTTGATGAAGGAAATTTTGGACAAGAAGGTCGAAAAGGTCACCATCTCTAATAGATTGGTTTCTTCTCCATGTTGCATCGTTACTTCTACTTATGGTTGGACTGCTAATATGGAAAGAATCATGAAGGCTCAAGCCTTGAGAGATAATTCTACTATGGGTTACATGATGGCCAAGAAGCACTTGGAAATCAATCCAGATCATCCAATCGTTGAAACCTTGAGACAAAAAGCTGAAGCTGATAAGAATGATAAGGCCGTTAAGGATTTGGTCGTTTTGTTGTTTGAAACCGCCTTGTTATCTTCCGGTTTCTCATTGGAAGATCCACAAACACATTCCAACAGAATCTACAGAATGATCAAGTTGGGTTTGGGTATCGACGAAGATGAAGTTGCTGCTGAAGAACCTAATGCTGCTGTTCCAGACGAAATTCCACCATTGGAAGGTGATGAAGATGCTTCTAGAATGGAAGAAGTTGACCAAAACTTGTACTTCCAAGGTGATTACAAGGATGATGATGATAAGGGTTCTGGTGCTACCAATTTCAGTTTGTTGAAACAAGCTGGTGACGTCGAAGAAAATCCAGGTCCAATGGCTACTTCTAGATATGAACCAGTTGCAGAAATTGGTGTTGGTGCTTATGGTACTGTTTACAAAGCTAGAGATCCACATTCCGGTCATTTTGTTGCATTGAAGTCTGTTAGAGTTCCAAACGGCGGAGGCGGTGGTGGTGGTTTGCCAATTTCTACTGTTAGAGAAGTTGCCTTGTTGAGAAGATTGGAAGCTTTTGAACATCCAAACGTCGTTAGATTGATGGATGTTTGTGCTACCTCTAGAACCGATAGAGAAATCAAGGTTACCTTGGTTTTTGAACACGTCGATCAAGATTTGAGAACCTACTTGGATAAGGCTCCACCACCAGGTTTGCCAGCTGAAACTATCAAAGATTTGATGAGACAATTCTTGAGAGGTTTGGATTTCTTGCATGCTAACTGCATCGTTCACAGAGATTTGAAGCCAGAAAACATCTTGGTTACATCTGGTGGTACAGTTAAGTTGGCTGATTTTGGTTTGGCTAGAATCTACTCTTACCAAATGGCTTTGACTCCAGTTGTTGTTACTTTGTGGTATAGAGCCCCAGAAGTCTTGTTGCAATCTACTTACGCTACACCAGTTGATATGTGGTCTGTTGGTTGTATTTTCGCCGAAATGTTTAGAAGAAAGCCTTTGTTCTGTGGTAACTCCGAAGCTGATCAATTAGGTAAGATCTTCGATTTGATTGGTTTGCCTCCTGAAGATGATTGGCCTAGAGATGTTTCTTTGCCAAGAGGTGCTTTTCCACCAAGAGGTCCAAGACCAGTTCAATCTGTTGTTCCAGAAATGGAAGAAAGTGGTGCACAATTGTTGTTAGAAATGTTGACTTTCAACCCACACAAGAGAATTTCTGCTTTTAGAGCCTTGCAACACTCCTACTTACACAAAGATGAAGGTAACCCTGAACAAAACTTGTATTTTCAAGGTCATCATCACCATCACCATTGA
